# Supplementary material for: Comparative Proteome Identifies Complement Component 3-Mediated Immune Response as Key Difference of Colon Adenocarcinoma and Rectal Adenocarcinoma
Source: Front Oncol. 2021 Feb 15;10:617890. doi: 10.3389/fonc.2020.617890 (PMC7959172; doi:10.3389/fonc.2020.617890)
Supplement: Supplementary file 3 [file Table_2.xlsx]

## Sheet: sublocation
Table S2. Subcellular Location of DEPs.
Subcellular Location	Amount
Cytoplasm	229
Endosome	57
Cell membrane	46
Secreted	84
Mitochondria	52
Nucleus	153
Peroxisome	3
Golgi apparatus	27
Lysosome	11
Centrosome	10
Ribosome	2
