# Supplementary material for: Comparative Proteome Identifies Complement Component 3-Mediated Immune Response as Key Difference of Colon Adenocarcinoma and Rectal Adenocarcinoma
Source: Front Oncol. 2021 Feb 15;10:617890. doi: 10.3389/fonc.2020.617890 (PMC7959172; doi:10.3389/fonc.2020.617890)
Supplement: Supplementary file 4 [file Table_3.xlsx]

## Sheet: goenrichment
Table S3. Biological pathway enrichment of DEPs.
ID	Description	GeneRatio	BgRatio	p.adjust	qvalue	geneID	Count
GO:0030449	regulation of complement activation	21/583	115/18670	2.41421e-07	2.22765e-07	A2M/F2/CFH/CFI/CFB/C1QB/C1QC/C1R/C1S/C2/C3/C4A/C4B/C4BPA/C4BPB/C5/C6/C7/C8A/C8B/C8G	21
GO:0002920	regulation of humoral immune response	21/583	134/18670	2.3045e-06	2.12641e-06	A2M/F2/CFH/CFI/CFB/C1QB/C1QC/C1R/C1S/C2/C3/C4A/C4B/C4BPA/C4BPB/C5/C6/C7/C8A/C8B/C8G	21
GO:0006957	complement activation, alternative pathway	8/583	16/18670	1.23716e-05	1.14156e-05	CFH/CFB/C3/C5/C7/C8A/C8B/C8G	8
GO:0006956	complement activation	22/583	175/18670	3.08057e-05	2.84252e-05	A2M/F2/CFH/APCS/CFI/CFB/C1QB/C1QC/C1R/C1S/C2/C3/C4A/C4B/C4BPA/C4BPB/C5/C6/C7/C8A/C8B/C8G	22
GO:0006958	complement activation, classical pathway	18/583	137/18670	0.000227938	0.000210324	APCS/CFI/C1QB/C1QC/C1R/C1S/C2/C3/C4A/C4B/C4BPA/C4BPB/C5/C6/C7/C8A/C8B/C8G	18
GO:0002479	antigen processing and presentation of exogenous peptide antigen via MHC class I, TAP-dependent	13/583	75/18670	0.000350417	0.000323338	PSMD14/CYBA/IKBKB/NCF2/NCF4/PSMA2/PSMB1/PSMB3/PSMB6/PSMB7/PSMB10/NCF1/PSMF1	13
GO:0002478	antigen processing and presentation of exogenous peptide antigen	20/583	175/18670	0.000356509	0.000328959	PSMD14/CLTA/CTSD/CYBA/AP2A2/HLA-DPA1/HLA-DPB1/IKBKB/NCF2/NCF4/LGMN/PSMA2/PSMB1/PSMB3/PSMB6/PSMB7/PSMB10/NCF1/PSMF1/KIF23	20
GO:0008380	RNA splicing	36/583	469/18670	0.000372041	0.000343291	SUGP2/SF3B4/SMNDC1/BCAS2/IVNS1ABP/CELF1/USP39/CPSF4/PAPOLA/RNPS1/SF3B2/DHX8/DNAJC8/RALY/NCBP2/MTREX/FRG1/GEMIN5/VIRMA/HTATSF1/GTF2F2/YBX1/DBR1/DDX47/CDC40/LUC7L2/PPP1R8/PRPF38B/IWS1/SRSF1/TMBIM6/USP4/WDR77/ESRP2/SF3B5/PTBP3	36
GO:0042590	antigen processing and presentation of exogenous peptide antigen via MHC class I	13/583	79/18670	0.000399426	0.00036856	PSMD14/CYBA/IKBKB/NCF2/NCF4/PSMA2/PSMB1/PSMB3/PSMB6/PSMB7/PSMB10/NCF1/PSMF1	13
GO:0002455	humoral immune response mediated by circulating immunoglobulin	18/583	150/18670	0.000399426	0.00036856	APCS/CFI/C1QB/C1QC/C1R/C1S/C2/C3/C4A/C4B/C4BPA/C4BPB/C5/C6/C7/C8A/C8B/C8G	18
GO:0019884	antigen processing and presentation of exogenous antigen	20/583	182/18670	0.000399426	0.00036856	PSMD14/CLTA/CTSD/CYBA/AP2A2/HLA-DPA1/HLA-DPB1/IKBKB/NCF2/NCF4/LGMN/PSMA2/PSMB1/PSMB3/PSMB6/PSMB7/PSMB10/NCF1/PSMF1/KIF23	20
GO:0002446	neutrophil mediated immunity	37/583	499/18670	0.000399426	0.00036856	A1BG/PSMD14/ATG7/PDAP1/CTSD/CYBA/AP2A2/F2/NBEAL2/HEBP2/ALOX5/FTH1/FUCA2/ARMC8/AOC1/B4GALT1/AMPD3/GPI/LAMTOR2/ABR/ANPEP/NCKAP1L/PECAM1/PKM/PSMA2/KCMF1/PSMB1/PSMB7/S100A12/S100P/SURF4/VAMP7/C3/DGAT1/CD14/SCAMP1/CDA	37
GO:0016064	immunoglobulin mediated immune response	22/583	218/18670	0.000451622	0.000416722	MSH6/APCS/CFI/EXOSC3/NECTIN2/C1QB/C1QC/C1R/C1S/C2/C3/C4A/C4B/C4BPA/C4BPB/C5/C6/C7/C8A/C8B/C8G/GCNT3	22
GO:0043312	neutrophil degranulation	36/583	485/18670	0.000466845	0.000430769	A1BG/PSMD14/ATG7/PDAP1/CTSD/CYBA/AP2A2/NBEAL2/HEBP2/ALOX5/FTH1/FUCA2/ARMC8/AOC1/B4GALT1/AMPD3/GPI/LAMTOR2/ABR/ANPEP/NCKAP1L/PECAM1/PKM/PSMA2/KCMF1/PSMB1/PSMB7/S100A12/S100P/SURF4/VAMP7/C3/DGAT1/CD14/SCAMP1/CDA	36
GO:0019724	B cell mediated immunity	22/583	221/18670	0.000471143	0.000434735	MSH6/APCS/CFI/EXOSC3/NECTIN2/C1QB/C1QC/C1R/C1S/C2/C3/C4A/C4B/C4BPA/C4BPB/C5/C6/C7/C8A/C8B/C8G/GCNT3	22
GO:0002283	neutrophil activation involved in immune response	36/583	488/18670	0.000471143	0.000434735	A1BG/PSMD14/ATG7/PDAP1/CTSD/CYBA/AP2A2/NBEAL2/HEBP2/ALOX5/FTH1/FUCA2/ARMC8/AOC1/B4GALT1/AMPD3/GPI/LAMTOR2/ABR/ANPEP/NCKAP1L/PECAM1/PKM/PSMA2/KCMF1/PSMB1/PSMB7/S100A12/S100P/SURF4/VAMP7/C3/DGAT1/CD14/SCAMP1/CDA	36
GO:0048002	antigen processing and presentation of peptide antigen	20/583	189/18670	0.000497115	0.0004587	PSMD14/CLTA/CTSD/CYBA/AP2A2/HLA-DPA1/HLA-DPB1/IKBKB/NCF2/NCF4/LGMN/PSMA2/PSMB1/PSMB3/PSMB6/PSMB7/PSMB10/NCF1/PSMF1/KIF23	20
GO:0070482	response to oxygen levels	31/583	394/18670	0.00056331	0.000519779	NAMPT/PSMD14/NDRG1/ATG7/POSTN/USP19/CYGB/CLCA1/CYBA/HIGD1A/HDAC2/ITPR2/MMP2/NF1/PDK1/PKM/PSMA2/PSMB1/PSMB3/PSMB6/PSMB7/PSMB10/PTGIS/REG1A/ELOB/TMBIM6/THBS1/CA9/CUL2/PSMF1/CD38	31
GO:0016197	endosomal transport	22/583	226/18670	0.00056331	0.000519779	CHMP4B/ACAP2/PTPN23/TMEM87A/CHMP2A/ARF6/VPS28/ANKFY1/HEATR5B/VPS53/GRIPAP1/VPS52/UBE2O/VPS16/STX5/VPS37B/STAM/UBXN6/EEA1/RAB11B/GCC2/SNX17	22
GO:0042119	neutrophil activation	36/583	498/18670	0.000600155	0.000553777	A1BG/PSMD14/ATG7/PDAP1/CTSD/CYBA/AP2A2/NBEAL2/HEBP2/ALOX5/FTH1/FUCA2/ARMC8/AOC1/B4GALT1/AMPD3/GPI/LAMTOR2/ABR/ANPEP/NCKAP1L/PECAM1/PKM/PSMA2/KCMF1/PSMB1/PSMB7/S100A12/S100P/SURF4/VAMP7/C3/DGAT1/CD14/SCAMP1/CDA	36
GO:0061418	regulation of transcription from RNA polymerase II promoter in response to hypoxia	12/583	77/18670	0.000880048	0.000812041	PSMD14/HIGD1A/PSMA2/PSMB1/PSMB3/PSMB6/PSMB7/PSMB10/ELOB/CA9/CUL2/PSMF1	12
GO:0036293	response to decreased oxygen levels	29/583	370/18670	0.0010945	0.00100992	NAMPT/PSMD14/NDRG1/POSTN/USP19/CYGB/CLCA1/CYBA/HIGD1A/ITPR2/MMP2/NF1/PDK1/PKM/PSMA2/PSMB1/PSMB3/PSMB6/PSMB7/PSMB10/PTGIS/REG1A/ELOB/TMBIM6/THBS1/CA9/CUL2/PSMF1/CD38	29
GO:0006959	humoral immune response	28/583	356/18670	0.00141849	0.00130888	PGLYRP2/A2M/F2/GPI/CFH/APCS/CFI/REG3A/PSMB10/REG1A/S100A12/CFB/C1QB/C1QC/C1R/C1S/C2/C3/C4A/C4B/C4BPA/C4BPB/C5/C6/C7/C8A/C8B/C8G	28
GO:0002474	antigen processing and presentation of peptide antigen via MHC class I	13/583	96/18670	0.00142692	0.00131666	PSMD14/CYBA/IKBKB/NCF2/NCF4/PSMA2/PSMB1/PSMB3/PSMB6/PSMB7/PSMB10/NCF1/PSMF1	13
GO:0019882	antigen processing and presentation	21/583	226/18670	0.00142692	0.00131666	PSMD14/CLTA/CTSD/CYBA/AP2A2/HLA-DPA1/HLA-DPB1/IKBKB/NCF2/NCF4/LGMN/PSMA2/PSMB1/PSMB3/PSMB6/PSMB7/PSMB10/NCF1/THBS1/PSMF1/KIF23	21
GO:0001666	response to hypoxia	28/583	359/18670	0.00142692	0.00131666	PSMD14/NDRG1/POSTN/USP19/CYGB/CLCA1/CYBA/HIGD1A/ITPR2/MMP2/NF1/PDK1/PKM/PSMA2/PSMB1/PSMB3/PSMB6/PSMB7/PSMB10/PTGIS/REG1A/ELOB/TMBIM6/THBS1/CA9/CUL2/PSMF1/CD38	28
GO:1901293	nucleoside phosphate biosynthetic process	24/583	282/18670	0.00142692	0.00131666	NAMPT/PNKP/COX5B/DCK/ERH/LCLAT1/MPC2/GCDH/AMPD3/SLC35B2/PDK1/PFAS/ATP5PF/PKM/AGPAT5/PRPS2/PRPSAP1/PRPSAP2/PTGIS/SHMT1/ELOVL1/TK1/PARP9/PAPSS1	24
GO:0002697	regulation of immune effector process	33/583	462/18670	0.00142692	0.00131666	PGLYRP2/A2M/F2/GPI/ABR/CFH/CFI/LBP/MMP12/EXOSC3/NECTIN2/CFB/STX4/VAMP7/TMBIM6/C1QB/C1QC/C1R/C1S/C2/C3/C4A/C4B/C4BPA/C4BPB/C5/C6/C7/C8A/C8B/C8G/NLRX1/PARP9	33
GO:0043687	post-translational protein modification	28/583	361/18670	0.00145935	0.00134658	PSMD14/CRTAP/ATG7/FGG/FUCA2/APOB/KNG1/MFGE8/NUCB1/NUB1/PSMA2/PSMB1/PSMB3/PSMB6/PSMB7/PSMB10/RBBP5/FN3K/ELOB/TF/C3/C4A/CUL5/CALU/CUL2/COPS3/RAB11B/PSMF1	28
GO:0072376	protein activation cascade	7/583	27/18670	0.00193692	0.00178724	A2M/F2/F9/F12/F13A1/FGG/KNG1	7
GO:0072378	blood coagulation, fibrin clot formation	7/583	27/18670	0.00193692	0.00178724	A2M/F2/F9/F12/F13A1/FGG/KNG1	7
GO:0009165	nucleotide biosynthetic process	23/583	278/18670	0.00295051	0.00272251	NAMPT/PNKP/COX5B/DCK/ERH/LCLAT1/MPC2/GCDH/AMPD3/SLC35B2/PDK1/PFAS/ATP5PF/PKM/AGPAT5/PRPS2/PRPSAP1/PRPSAP2/PTGIS/SHMT1/ELOVL1/PARP9/PAPSS1	23
GO:0019835	cytolysis	8/583	40/18670	0.0034658	0.00319797	F2/LBP/C5/C6/C7/C8A/C8B/C8G	8
GO:1903311	regulation of mRNA metabolic process	25/583	324/18670	0.00401655	0.00370617	PSMD14/SF3B4/CELF1/CPSF4/PAPOLA/RNPS1/EXOSC8/NCBP2/CARHSP1/VIRMA/CNOT7/YBX1/EXOSC3/SAMD4B/IWS1/PCID2/PSMA2/PSMB1/PSMB3/PSMB6/PSMB7/PSMB10/SRSF1/CDC73/PSMF1	25
GO:0031145	anaphase-promoting complex-dependent catabolic process	11/583	81/18670	0.00499554	0.0046095	PSMD14/PSMA2/PSMB1/PSMB3/PSMB6/PSMB7/PSMB10/ANAPC1/UBE2E1/CDC16/PSMF1	11
GO:0071453	cellular response to oxygen levels	20/583	234/18670	0.00561513	0.00518121	NAMPT/PSMD14/NDRG1/ATG7/USP19/CLCA1/HIGD1A/PDK1/PSMA2/PSMB1/PSMB3/PSMB6/PSMB7/PSMB10/PTGIS/ELOB/TMBIM6/CA9/CUL2/PSMF1	20
GO:0036294	cellular response to decreased oxygen levels	19/583	217/18670	0.0060545	0.00558663	NAMPT/PSMD14/NDRG1/USP19/CLCA1/HIGD1A/PDK1/PSMA2/PSMB1/PSMB3/PSMB6/PSMB7/PSMB10/PTGIS/ELOB/TMBIM6/CA9/CUL2/PSMF1	19
GO:0010499	proteasomal ubiquitin-independent protein catabolic process	6/583	23/18670	0.00636247	0.0058708	PSMA2/PSMB1/PSMB3/PSMB6/PSMB7/PSMB10	6
GO:0000377	RNA splicing, via transesterification reactions with bulged adenosine as nucleophile	27/583	379/18670	0.00668957	0.00617263	SF3B4/SMNDC1/BCAS2/CELF1/USP39/CPSF4/PAPOLA/RNPS1/SF3B2/DHX8/DNAJC8/RALY/NCBP2/MTREX/FRG1/GEMIN5/HTATSF1/GTF2F2/YBX1/DBR1/CDC40/LUC7L2/SRSF1/USP4/WDR77/ESRP2/SF3B5	27
GO:0000398	mRNA splicing, via spliceosome	27/583	379/18670	0.00668957	0.00617263	SF3B4/SMNDC1/BCAS2/CELF1/USP39/CPSF4/PAPOLA/RNPS1/SF3B2/DHX8/DNAJC8/RALY/NCBP2/MTREX/FRG1/GEMIN5/HTATSF1/GTF2F2/YBX1/DBR1/CDC40/LUC7L2/SRSF1/USP4/WDR77/ESRP2/SF3B5	27
GO:0000375	RNA splicing, via transesterification reactions	27/583	382/18670	0.00745611	0.00687993	SF3B4/SMNDC1/BCAS2/CELF1/USP39/CPSF4/PAPOLA/RNPS1/SF3B2/DHX8/DNAJC8/RALY/NCBP2/MTREX/FRG1/GEMIN5/HTATSF1/GTF2F2/YBX1/DBR1/CDC40/LUC7L2/SRSF1/USP4/WDR77/ESRP2/SF3B5	27
GO:0071456	cellular response to hypoxia	18/583	207/18670	0.00909787	0.00839482	PSMD14/NDRG1/USP19/CLCA1/HIGD1A/PDK1/PSMA2/PSMB1/PSMB3/PSMB6/PSMB7/PSMB10/PTGIS/ELOB/TMBIM6/CA9/CUL2/PSMF1	18
GO:0010498	proteasomal protein catabolic process	31/583	477/18670	0.0099984	0.00922576	PSMD14/UBE4B/ERLIN1/USP19/ATE1/GLMN/CSNK1D/ARMC8/ERLEC1/UBAC2/ARAF/ARRB1/NUB1/PSMA2/PSMB1/PSMB3/PSMB6/PSMB7/PSMB10/PCNP/ANAPC1/SMARCC1/UBE2D3/UBE2E1/UBE2G1/HECTD3/CUL5/UBXN6/CUL2/CDC16/PSMF1	31
GO:0043618	regulation of transcription from RNA polymerase II promoter in response to stress	13/583	121/18670	0.0099984	0.00922576	PSMD14/HIGD1A/PSMA2/PSMB1/PSMB3/PSMB6/PSMB7/PSMB10/ELOB/TMBIM6/CA9/CUL2/PSMF1	13
