# Supplementary material for: Comparative Proteome Identifies Complement Component 3-Mediated Immune Response as Key Difference of Colon Adenocarcinoma and Rectal Adenocarcinoma
Source: Front Oncol. 2021 Feb 15;10:617890. doi: 10.3389/fonc.2020.617890 (PMC7959172; doi:10.3389/fonc.2020.617890)
Supplement: Supplementary file 5 [file Table_4.xlsx]

## Sheet: Sheet1
Table S4. The proteins to establish TOM.
Name	AccesionID	Fold Change	P-value
A1BG	P04217	1.87064	0.024758
A2M	P01023	1.70883	0.00740723
ABR	Q12979	2.88364	0.00223818
ALOX5	P09917	1.98464	0.0284477
AMPD3	Q01432	1.54284	0.0453163
ANPEP	P15144	1.9869	0.0482861
AP2A2	O94973	1.53724	0.0483071
APCS	P02743	2.5095	0.0143593
B4GALT1	P15291	2.44382	0.00629399
C1QB	P02746	2.27769	0.014912
C1QC	P02747	1.58726	0.0397826
C1R	P00736	2.52222	0.0247513
C1S	P09871	1.54142	0.0265475
C2	P06681	2.58418	0.00379933
C3	P01024	1.79839	0.00170215
C4A	P0C0L4	1.62193	0.0101769
C4B	P0C0L5	4.30963	0.00413978
C4BPA	P04003	2.27928	0.00740446
C4BPB	P20851	1.97424	0.00740168
C5	P01031	2.68328	0.00740723
C6	P13671	3.67033	0.00869399
C7	P10643	2.57513	0.00770894
C8A	P07357	3.21469	0.00490296
C8B	P07358	3.98924	0.000394761
C8G	P07360	2.85334	0.00533367
CD14	P08571	1.52281	0.0424831
CDA	P32320	1.65238	0.00450769
CFB	P00751	1.70315	0.00186606
CFH	P08603	1.8185	0.0138335
CFI	P05156	3.60508	0.000535035
CTSD	P07339	1.50713	0.0138335
CYBA	P13498	1.93827	0.0453062
EXOSC3	Q9NQT5	3.04083	0.0024487
F2	P00734	1.76885	0.024758
FTH1	P02794	0.383678	0.00292502
FUCA2	Q9BTY2	2.80477	0.0128244
GPI	P06744	1.53315	0.00348451
HEBP2	Q9Y5Z4	0.640183	0.00869399
HLA-DPA1	P20036	2.78388	0.024758
HLA-DPB1	P04440	2.54952	0.000795916
KIF23	Q02241	1.82864	0.0105739
LAMTOR2	Q9Y2Q5	2.18402	0.0138335
LGMN	Q99538	3.20485	0.0284477
NBEAL2	Q6ZNJ1	2.22821	0.00740723
NCF1	P14598	2.21556	0.0372643
NCF2	P19878	1.9891	0.023074
NCF4	Q15080	1.89567	0.0294333
NECTIN2	Q92692	2.45586	0.011881
PDAP1	Q13442	0.39112	0.0128244
PECAM1	P16284	5.60811	0.000966466
PGLYRP2	Q96PD5	5.25203	0.000966466
PKM	P14618	1.51419	0.00204437
PSMA2	P25787	1.65259	0.0326015
PSMB1	P20618	1.83806	0.00379933
PSMB10	P40306	2.30988	0.0118771
PSMB3	P49720	1.59437	0.00141335
PSMD14	O00487	1.59567	0.0143547
PSMF1	Q92530	1.58118	0.0109997
S100A12	P80511	4.26531	0.011881
S100P	P25815	0.176037	0.00155157
SURF4	O15260	2.32633	0.016064
VAMP7	P51809	2.04048	0.02

## Sheet: Sheet3
Name	PSMD14	SURF4	AP2A2	F2	C1R	CFB	A2M	C3	C5	APCS	C1QB	C1QC	FTH1	C4BPA	A1BG	HLA-DPB1	CFI	C2	GPI	CTSD	C8A	C8B	C8G	CD14	CFH	C1S	ALOX5	C4A	C4B	C7	CYBA	C6	NCF1	ANPEP	B4GALT1	PECAM1	NCF2	HLA-DPA1	PSMB1	C4BPB	PSMA2	S100P	CDA	PSMB10	PSMB3	VAMP7	S100A12	AMPD3	KIF23
C10_3552	0.598449	1.83257	0.655228	1.66108	-1.06536	2.24728	2.93088	3.15888	-0.755381	-0.407441	-0.86578	-0.0837026	-2.52819	0.60543	0.759768	-1.83693	-0.877584	-0.834373	4.47503	3.23237	-3.68988	-1.87627	-2.82784	1.21295	0.601246	-1.01215	-2.25231	1.54773	-2.03715	-2.75092	-4.226	-2.70374	-2.19216	-1.81454	-0.537003	0.564081	-1.66055	-0.592229	2.27167	-4.3014	0.363291	-2.05094	-3.97661	1.39699	2.10304	-4.17888	-1.63148	-3.51373	-3.49726
C11_3554	0.427941	1.30328	0.566613	2.05863	0.520762	2.17244	3.22591	3.30699	-0.167219	1.24385	0.205428	0.180804	-0.476942	1.24427	1.06946	-4.2387	-1.13958	-2.46965	4.62308	4.39519	-0.736972	-1.05867	-0.628244	2.10458	0.402086	-0.546896	-0.0300351	3.16637	0.864763	-1.88422	0.828011	-0.643694	0.624607	-0.593178	-0.614694	1.41985	0.43079	-1.23035	2.08739	-3.5074	1.32695	1.6102	-0.566847	1.50999	1.93082	-2.3116	2.18033	-1.80188	-2.24631
C12_3558	0.107017	1.78618	-0.233075	4.43459	0.258252	2.72099	4.39189	4.61999	3.46068	1.19592	1.36927	1.97578	-2.31274	3.77838	2.08347	-4.88006	0.545956	0.0727381	4.92893	3.36582	0.869575	1.66582	2.12107	1.79981	2.17369	-0.214988	-2.58634	3.4368	0.724429	2.84559	0.0388057	3.05855	0.595525	1.33831	-1.13874	-1.26193	-0.221463	-0.727443	1.46467	-0.607809	1.78493	1.48542	-0.537732	0.756915	1.95347	-2.93012	4.37387	-1.93622	-1.6108
C13_3561	-0.0801725	-0.901377	-0.352935	1.62151	0.264009	2.74246	3.51215	3.72783	0.396846	0.793707	0.130182	1.37215	-0.891936	2.687	1.55756	-3.931	-0.647997	-0.818267	4.0375	0.773675	-0.928553	-2.60117	-2.74503	0.357388	1.51323	0.0349183	-3.44902	3.39622	-2.95938	-4.0782	-4.16216	-2.38262	-3.8963	-4.08163	-1.26019	-1.58596	-4.9417	-4.07299	1.39786	-2.25246	0.889402	-0.13024	-4.16468	-4.79597	1.56203	-1.15303	-2.44143	-4.94191	-1.56408
C1_3807	-0.294678	0.999782	0.400107	0.607093	-0.903004	1.5902	3.2324	2.78995	-1.99248	-0.402712	-0.581291	0.136305	-2.89127	0.141983	-1.09648	-3.80409	-2.71234	-2.77833	4.83088	3.22097	-3.40329	-2.81547	-4.59409	0.597085	0.0291778	-0.858295	-0.983623	1.62183	0.110562	-3.27192	-4.95283	-4.82497	-0.574763	-4.01618	-3.80728	-0.444806	-0.643693	-3.91302	1.18325	-2.54967	0.486458	1.54988	-3.61643	0.826222	1.14158	-4.55782	4.04931	-4.3507	-3.22888
C14_3664	2.19462	1.04587	1.09186	0.515181	-1.20894	1.68367	2.1394	2.76781	-1.66301	0.128993	-1.5045	0.289249	-3.94672	0.0434646	1.12719	-4.43761	-3.41858	-0.936721	3.35167	4.578	-3.01417	-2.63691	-2.89116	1.17647	-0.109997	-1.74249	-4.29331	1.70853	-5.53327	-3.99511	-4.44012	-3.45475	-2.7053	-4.53893	-0.708636	0.029493	-1.76077	-0.262092	2.22976	-4.60237	-1.53293	-3.97164	-4.17875	0.524023	2.42364	-2.69963	-3.29746	-3.17706	-2.96697
C15_3672	0.241052	2.05192	-0.39545	2.2068	0.80651	1.68633	2.83991	3.38324	2.0211	2.0428	1.28052	0.981304	-2.12825	2.53197	0.938755	1.53819	-0.673211	-2.65942	5.49416	3.8717	0.33503	-0.492588	0.6439	0.839783	0.265931	0.422962	-0.667371	2.40298	1.75667	-0.139992	1.35837	1.14055	-0.481258	-0.982698	-3.8117	1.00319	-0.496851	2.54469	2.23352	-2.52941	1.56621	2.21281	-1.79606	2.28643	1.6336	-4.05292	0.935492	-4.6059	-4.40292
C16_3695	0.452199	0.521012	-0.000564993	1.61388	-0.236531	3.0337	2.80033	3.13231	-0.131742	0.291921	0.1569	0.588774	-2.009	1.17129	0.777022	-3.23742	-1.09933	-1.17174	3.43544	2.16235	-1.81875	-1.30241	-1.15186	1.02219	0.913927	-0.417789	-3.25762	2.1545	-2.09147	-2.15754	-3.38745	-1.27398	-4.15626	-2.64483	-3.08844	0.109305	-1.8041	-1.77672	1.99241	-4.28386	1.08237	-4.26974	-3.13477	0.474503	1.6554	-2.26353	-4.63579	-3.78086	-4.93707
C17_3864	0.705353	2.41772	0.828726	1.26071	-0.412523	1.9039	2.95287	3.2232	-0.243866	-0.978876	-0.266484	0.589469	-3.86312	1.17345	0.840684	-3.39265	-0.741858	-3.58413	4.97286	3.58283	-1.82336	-1.68521	-0.890163	-0.0261547	0.298967	-1.09398	-4.01978	2.62018	-0.191682	-5.47213	-0.178649	-0.704016	-3.49317	-0.734451	-0.119278	-3.32688	-3.31631	-4.03775	2.32966	-3.28234	1.88123	1.6008	-3.10823	0.516332	1.87505	-3.37306	2.24689	-3.14746	-1.93938
C18_A00F	0.185529	2.10417	0.336601	0.912688	-0.908803	1.76102	2.58238	2.54296	-2.65283	0.747213	-0.881298	-0.126561	-0.791869	-0.160706	1.07514	-4.51727	-3.90339	-2.50876	4.41858	3.73276	-5.15067	-2.68123	-1.8695	0.618398	0.0162856	-1.3722	-3.5736	1.82342	-1.20596	-5.28698	-3.14278	-2.57614	-3.47898	-3.17232	0.30329	-0.430807	-3.18394	-0.428481	2.36408	-4.65832	2.2488	2.783	-2.99563	1.63166	1.65097	-5.49159	-0.242115	-3.97214	-3.85436
C19_A02O	1.92953	1.29769	0.746937	0.591101	-1.86691	0.536917	2.08509	2.57513	-2.07785	1.76498	-2.15252	-0.698264	-0.939577	-1.29201	1.67185	-4.61362	-4.07667	-2.95227	4.41442	4.16418	-3.84381	-3.92087	-2.83354	1.43034	-0.689536	-1.65349	-3.28627	1.52959	-0.947576	-3.80688	-3.73613	-4.7603	-3.33675	-4.21815	-3.55323	-4.98441	-2.56062	-1.73833	2.80209	-4.43127	1.33598	-1.09362	-2.96019	1.65494	1.65196	-2.82933	-3.97748	-3.36599	-4.15519
C2_3808	-0.723387	1.6892	0.549351	2.46017	0.557503	2.99866	4.39662	4.38687	0.719082	2.14138	0.728626	1.61028	-2.5668	2.155	2.12519	-4.37844	-0.321041	-1.28654	4.24913	3.61733	0.766048	0.164169	-0.172349	2.11821	1.52825	-0.0234006	-1.65099	3.16905	0.0968998	-0.688751	-4.73306	0.527014	-3.25626	-2.09794	-5.63995	-1.97324	-2.58574	-0.143324	1.08597	-2.52239	0.14993	-4.79086	-4.38208	0.502585	0.35639	-0.678381	-1.6702	-3.83059	-4.01049
C20_A010	-3.15049	1.31215	0.532238	1.64275	-0.81085	2.5948	3.15708	3.35754	-2.09117	-0.159279	0.420455	1.32952	-1.9136	1.14225	1.70864	-4.50649	-0.263556	-2.63374	4.08474	4.05182	-1.32851	-1.34835	-1.74261	1.31728	1.18601	-0.993334	-1.58664	2.52827	-4.03279	-4.5297	-3.93241	-4.75449	-0.76561	-1.27244	-2.68557	-3.44161	-0.801105	1.45805	1.62812	-4.03576	0.409037	-0.172459	-4.38167	-0.515965	1.32935	-3.0342	-1.44941	-3.98353	-3.74966
C3_3810	-0.389397	0.81884	0.0693881	1.85866	0.960105	3.18745	2.48095	3.6238	0.132732	1.85523	0.662095	1.59368	-1.00857	1.56021	0.498619	-2.63803	-0.651922	-0.827096	3.76156	4.09265	-0.339529	-0.548684	-0.0795122	1.06723	1.41824	0.475206	-1.4153	2.34836	0.548364	-2.0342	-4.11957	-1.57313	-2.12349	-3.37	-1.93975	-1.06146	-1.32202	-0.792168	1.35472	-3.73995	-0.274342	-4.51767	-3.96981	0.56725	1.08867	-3.04788	-1.60504	-3.89709	-3.80699
C4_3518	0.164244	1.77407	1.09826	2.63911	0.0679042	3.27061	4.16575	4.3716	0.606766	2.71606	0.726562	1.74454	-1.63224	2.63302	1.83198	0.613258	0.458355	-0.536656	4.47386	4.30036	-1.41237	-0.617692	-0.686525	2.44175	1.86385	0.232304	-1.60277	3.32184	1.60208	-1.51843	-3.04752	-1.17044	-5.06311	-2.11662	-1.73826	1.22384	-0.754402	0.818536	1.57372	-1.34193	1.09357	2.1094	-3.36639	1.77013	1.65947	-2.10088	-1.50135	-2.53214	-4.70736
C5_3525	-0.671515	1.53159	-1.26053	0.266907	-1.86888	0.945439	3.41771	3.3513	-3.55329	0.36457	-0.829424	0.0977031	-2.46209	0.416345	0.191163	-4.05468	-1.37017	-4.00851	4.36516	4.19472	-3.19322	-1.7715	-1.68004	-0.974647	-0.254624	-1.22144	-1.6766	1.88875	-2.28905	-2.75686	-3.98127	-1.99904	-3.48155	-4.24101	-0.830169	0.666688	-1.58365	-3.457	1.7714	-3.67101	1.79602	5.01381	-4.03719	-0.77349	1.961	-2.76932	3.20647	-3.74055	-3.44608
C6_3526	0.937215	0.759987	1.09058	1.74665	-0.417303	2.0113	2.69999	3.37192	0.193597	1.31715	1.09154	1.70185	-0.319953	1.14435	0.0305251	-2.66512	-0.832029	-2.23268	3.2477	4.4295	-0.099097	-2.90367	-2.04848	1.19048	1.43779	-0.567601	-1.33602	1.73551	-4.40418	-1.84369	-4.10498	-0.177055	0.582977	-1.85164	-0.834435	0.0695089	-0.936047	-2.5975	2.98726	-4.29518	-0.0884164	2.88302	-3.11771	-3.51667	0.751496	-2.36206	-1.84263	-4.24037	-4.39321
C7_3529	0.651542	1.01345	0.787219	1.70914	0.0417119	2.24219	2.87042	3.15607	-0.52897	1.36981	-0.353733	0.708742	-1.19893	0.489145	0.951157	-3.37952	-1.53651	-1.41211	4.47257	3.63784	-0.698268	-1.44758	-0.915594	1.54627	0.378985	-0.69162	-1.69559	1.68536	-1.62795	-3.09479	-4.47709	-2.18774	-0.606831	-1.05014	-0.679968	0.226704	-0.955078	-3.85826	1.73997	-5.05973	1.5038	2.72047	-4.02031	1.31752	1.60009	-2.56096	0.0576924	-3.07298	-1.93293
C8_3531	0.438296	-2.66139	0.566491	1.58273	-0.964551	1.51681	2.86332	2.56502	-0.256066	-0.138299	-1.42655	1.04552	-3.21383	1.03675	0.650565	-4.43099	-2.63985	-1.07576	3.00839	3.14307	-0.464031	-3.82636	-2.97789	0.166702	0.890614	-1.54267	-3.61233	2.04533	-3.4929	-3.03642	-3.48239	-0.937693	-3.38764	-2.63673	-1.00283	-0.535408	-3.92392	-3.67463	1.41983	-3.83853	-0.437404	1.5154	-3.60068	-1.08032	1.06688	-1.48001	-4.57072	-4.11075	-3.77114
C9_3534	-0.362878	2.3077	1.40118	2.00281	-1.51974	2.14295	3.81421	3.23227	0.108565	1.25963	-3.35579	-0.93895	-2.76231	-1.50605	2.07597	-4.91972	-0.321483	-1.84248	4.15761	3.94273	-1.09934	-2.22864	0.0240602	1.8209	0.673041	-0.965865	-1.58368	2.25124	2.22328	-1.23131	-5.14246	0.162728	-4.05682	-0.630908	-2.8919	-0.166349	-0.778485	-0.55065	2.52191	-4.2617	1.57977	-4.38422	-3.63175	0.658811	2.06676	-3.19837	-3.39114	-3.22576	-4.01267
R10_A02N	-0.635356	-1.07566	-2.09639	-0.0495817	-4.93711	0.98107	2.28419	2.59272	-1.12321	-1.42852	-0.844503	0.62519	-1.13918	-1.57139	0.274755	-3.73591	-4.31312	-4.18149	4.21168	2.57177	-5.22429	-4.75336	-3.36855	0.921628	-1.71292	-1.96287	-2.4504	0.976794	-2.40163	-5.64494	-4.13955	-6.59704	-4.27799	-5.88	-4.21385	-5.96003	-4.7243	-4.72932	1.17605	-3.52038	0.443649	4.71187	-3.64274	0.282028	0.894067	-5.11639	-4.11598	-4.09367	-5.06026
R11_A02X	-0.839971	-3.9417	-5.34407	1.21847	-4.4573	1.57684	3.29842	2.72536	-0.84313	-0.64342	-2.25108	-0.143979	-1.99294	0.10781	0.048443	-4.12358	-5.27311	-0.846295	3.55086	1.99015	-4.60272	-5.5952	-1.74781	0.23189	-2.77625	-0.314387	-3.10424	2.05577	-6.00701	-5.37556	-6.16377	-5.91306	-5.63804	-5.32211	-5.95822	-4.41005	-2.00658	-4.14216	1.40679	-3.7654	1.26225	-1.14618	-3.85691	0.748676	0.792377	-4.75238	-0.452282	-4.88692	-5.25865
R1_2691	-0.500479	-0.820447	-0.0767932	1.30494	-1.53554	1.36388	2.3437	2.18179	-1.64431	-2.92435	-4.84133	-0.310511	-0.421919	1.60725	-3.78904	-4.58814	-5.82091	-3.26222	3.32112	1.65825	-4.50756	-3.90031	-3.35129	0.33299	-0.348685	-0.816626	-4.75776	2.20528	-3.40212	-3.81746	-4.59903	-5.08245	-3.61614	-3.07287	-4.24939	-4.33677	-4.13817	-4.231	0.453996	-4.91828	-1.11486	0.00343023	-4.39627	-2.85806	1.25615	-4.50205	-4.78766	-6.03069	-4.75295
R12_A011	-0.859906	0.0495605	-0.171469	-0.266508	-1.0248	1.27682	2.40587	2.52221	-2.35788	0.945104	-1.71597	-0.0701704	-0.620034	-0.540121	0.210886	-4.59573	-4.44723	-4.60655	3.75271	3.01692	-5.65886	-4.69622	-3.29363	1.21483	-0.0368027	-1.83393	-4.73022	2.14498	-2.95449	-4.95162	0.231411	-3.88524	-1.2843	-2.33694	-1.19611	-1.56643	-1.67797	-3.64222	1.70192	-4.16582	0.40443	4.17352	-1.32948	1.23242	1.4424	-5.33073	3.51441	-2.87201	-4.30908
R13_A014	0.0655701	1.32981	0.423638	0.64708	-1.12363	0.961898	4.03965	2.9744	-1.74472	-0.540625	-1.24848	0.823506	0.580848	-0.0649246	1.64827	-5.88168	-1.77373	-1.39151	4.57022	3.26627	-4.12427	-4.86822	-5.06745	-0.323537	0.584409	-1.99959	-4.91199	1.37888	-3.73103	-5.36893	-1.49713	-4.36436	0.376202	-2.2655	-1.87201	-1.74893	-2.28175	-4.85136	2.20345	-4.95899	1.77768	3.24507	-1.02486	0.495891	1.67944	-0.976153	0.211848	-2.9493	-3.38495
R14_A015	-0.603001	-0.603211	-0.0324487	-2.41664	-1.6711	0.808955	1.55817	1.53253	-3.95439	-1.2238	-1.80732	-0.700879	-0.77388	-0.738338	-0.191465	-3.42459	-1.8255	-4.31508	3.97598	2.70868	-3.12175	-5.22551	-3.86683	0.23499	-0.452692	-1.80129	-4.27697	1.03899	-4.83739	-4.8332	-4.54081	-4.43734	-4.4785	-3.07801	-3.49063	-2.97158	-5.01527	-4.33738	1.69189	-4.79013	-0.289702	4.23031	-5.47575	-0.841913	0.933527	-4.35195	-3.92261	-3.49908	-4.19284
R15_A016	-4.39405	-0.219561	-0.181407	0.438593	0.794352	1.92768	0.799324	2.25825	-1.37223	-2.35002	-1.51486	-0.414541	-2.2646	-0.219238	-1.38822	-5.3506	-1.36926	-5.37106	3.61392	2.21964	-4.86402	-4.96931	-5.73945	0.0870242	0.595407	-1.06351	-3.94319	1.22076	-3.90203	-3.96221	-3.51684	-4.05085	-4.24297	-4.66441	-4.68175	-5.57365	-4.71669	-4.61408	-0.48483	-4.48127	-1.345	3.07991	-5.28468	-3.72448	-0.663522	-4.01871	-4.59041	-5.06045	-4.63314
R16_A026	-0.241725	0.485394	-0.330474	1.46237	-3.77585	0.841779	1.76936	2.07177	-3.19437	-0.929676	-0.892428	-0.073958	-1.81639	0.986012	0.554461	-5.5041	-3.50288	-3.14093	3.70375	3.31874	-1.62134	-4.04634	-4.98619	0.731594	-0.489372	-1.91831	-2.86518	1.12223	-3.80186	-3.34807	-3.99504	-4.04249	-4.6232	-6.04845	-1.91432	-3.61843	-1.71381	-4.90143	1.51663	-4.41023	0.381755	3.4781	-1.61982	0.155089	0.870678	-1.91378	-0.551911	-4.17314	-4.22665
R17_A032	-1.53142	1.48605	0.0481022	-0.168564	-3.73635	0.3696	2.62895	1.69003	-2.95456	-1.53237	-1.81821	-0.746583	-2.18916	-0.66642	-1.54721	-3.50271	-2.85486	-1.9585	3.8852	2.09403	-3.06097	-4.14649	-3.38605	0.763544	-1.19117	-1.41569	-1.94856	0.493756	-3.29334	-3.96291	-5.43876	-2.4197	-3.91433	-1.82692	-1.0074	-3.72318	-2.048	-3.27112	0.818615	-4.22445	0.953745	2.79235	-4.35824	1.22664	1.35275	-2.52345	2.78102	-2.45831	-3.74793
R18_A036	-0.42801	-4.60835	0.38569	1.93439	0.366469	2.65718	2.2483	3.06258	-0.324111	3.63733	-4.34827	1.84904	1.01543	0.589236	1.73926	-4.61725	-1.00683	-0.604136	2.6947	3.17867	-3.23067	-4.23155	-1.67475	1.24526	1.54039	-0.568559	-2.89534	1.73551	-4.63102	-4.05149	-4.66631	0.207439	-6.18042	-4.28411	-4.32709	-0.409211	-4.40959	-5.09124	-1.87629	-4.79172	-1.97117	3.126	-4.41271	-2.19647	0.0416225	-1.96846	-5.45343	-5.21939	-5.63132
R19_2692	0.607593	-0.120293	0.747951	2.67779	0.382815	2.31455	2.78647	3.53756	0.0745145	1.03283	0.446613	0.0541671	0.295021	1.85814	0.877159	-4.72252	-1.02126	-3.26419	3.63664	3.63451	-1.23847	-1.64069	0.217907	0.349806	1.55004	-0.0616942	-1.53231	2.77469	-3.55854	-2.21036	-4.50307	-1.84054	-3.75234	-2.56588	-2.03702	-5.18024	-1.30483	-4.61857	1.65512	-3.85829	0.54931	1.89254	-4.41749	0.172067	1.06669	-3.67756	-0.327068	-3.23457	-4.37764
R20_A002	-0.811825	2.46875	0.148096	1.87677	-1.07744	1.94075	3.72798	3.35064	0.766215	0.248323	-0.73486	0.193763	-1.88133	2.19896	1.26816	-4.34774	-0.767455	-3.91761	4.04068	3.40635	-4.49984	-0.636813	-0.483421	0.946486	-0.381232	-0.526952	-4.85482	2.50963	2.19413	-1.94724	-3.91519	0.191089	-2.11782	-2.47482	-4.55982	0.463882	-0.750198	-5.113	0.571177	-4.75131	0.767449	3.64045	-4.85049	-4.89549	1.42319	-3.86198	-5.37259	-4.91645	-3.94212
R2_3574	-0.00330425	1.80411	1.61925	-0.359164	-2.05594	0.0941297	-0.227731	-0.000451977	-4.46768	-5.04052	-4.6029	-3.54819	1.75704	-5.49601	-1.83061	-4.37907	-4.48877	-4.85028	3.34485	4.01888	-4.15447	-4.62582	-3.04522	-2.27616	-0.908949	-3.38581	-4.12754	0.757466	-4.94729	-3.13186	-4.23073	-4.76544	-6.05078	3.53062	-4.97516	-4.80933	-3.82352	-0.802721	2.37048	-5.5079	1.32882	3.5824	-4.22508	0.0503206	1.78336	-4.32784	-4.49793	-4.86286	-4.31352
R3_A00C	-0.802052	-0.00560162	-0.665278	0.180954	-0.947651	0.464776	1.49083	1.72175	-4.24595	-3.48843	-2.89479	-0.655316	-0.61015	-1.36425	-0.0443404	-5.0306	-3.93297	-1.84585	3.02923	1.6161	-5.00945	-3.73236	-4.09675	-1.5728	-1.79246	-1.90332	-4.29452	0.930585	-4.00026	-3.91264	-4.88055	-5.28457	-2.21947	-2.99225	-1.54271	-4.55392	-3.40657	0.636408	-0.685205	-3.2114	-0.148923	3.94753	-4.73605	-2.74532	-0.692069	-4.23224	-3.64896	-4.48113	-3.71615
R4_A00Y	-0.0359548	-1.02585	-0.368533	1.2588	-0.210751	1.28511	2.1868	2.32615	-1.95059	0.22398	0.565544	0.854263	0.0635091	-0.0411689	-0.353638	-4.97228	-4.41349	-2.95532	2.91166	3.4206	-0.946282	-1.84059	-3.29212	0.853899	0.293009	-0.570653	-1.82539	1.05521	-5.58209	-4.15584	-4.61566	-2.5718	-2.92941	-2.52248	-1.12966	-5.02825	-3.69431	0.00818644	1.854	-3.51237	-1.30077	3.43843	-4.98275	-0.276551	1.11019	-2.1236	-4.52356	-4.4425	-4.54574
R5_A01J	0.875876	1.45542	1.13942	2.20818	0.610951	2.54917	3.94053	3.7006	-0.234984	1.84232	0.228499	1.52466	-1.41396	0.576159	1.80023	-4.84024	-5.85676	-1.08976	4.3711	4.86171	-0.656179	-1.02378	-0.753786	1.90191	1.25956	0.277716	-1.03605	2.91549	-3.31326	-2.16303	-4.70316	-0.964338	-1.45997	-1.33705	-4.60925	-0.301408	-0.659442	-0.412325	2.1637	-5.22915	1.23339	1.22188	-4.94717	0.75979	1.41211	-4.30246	-5.12083	-4.65125	-5.03784
R6_A01L	0.456934	1.59318	0.286454	1.36633	-3.45073	1.63972	2.28252	2.56163	-2.13252	1.35635	-0.579078	-0.269652	-0.0815203	-0.304634	0.8548	-4.91174	-2.42733	-4.14678	3.77874	3.78122	-3.42736	-4.62865	-2.79704	0.661913	0.100226	-0.969007	-3.19598	0.529441	-3.52506	-4.17243	-4.13476	-3.1051	-4.69758	-3.46595	-1.01389	-4.70561	-1.86857	0.990915	0.713483	-5.63892	0.29377	0.59267	-3.60386	0.331262	1.54504	-5.41201	-3.24532	-3.83249	-2.41707
R7_A01N	-0.392601	-1.56569	0.72922	0.131897	-1.02542	1.42152	1.67269	2.09747	-2.76692	-0.983097	-0.170028	0.323183	-2.46511	-0.418588	-0.158742	-5.48319	-3.19434	-1.98342	2.1426	3.5157	-3.053	-3.81753	-4.43634	-0.0598621	0.256685	-2.20606	-1.85286	1.28304	-5.15531	-4.44853	-4.00244	-2.63694	-0.920695	-2.34166	-3.07914	-0.260351	-2.24438	-4.6381	1.61835	-3.83682	-1.76725	3.36792	-4.48532	-4.93227	-0.221252	-3.9637	-4.07979	-3.95454	-4.12782
R8_A01W	-0.243573	1.39719	0.213048	1.52624	-0.684042	1.74959	3.21047	3.5433	-1.83594	-0.00120288	-0.332596	0.51304	-2.08021	0.919825	1.34167	-4.55413	-0.689063	-4.45799	3.64448	2.28174	-1.5718	-4.28067	-0.863313	1.75562	0.292341	-0.95411	-5.07741	2.47765	-0.152472	-4.07566	-3.57274	-1.20904	-3.47911	-4.25336	-2.09628	0.169335	-1.07939	-0.329922	1.07016	-4.28001	0.24571	3.17937	-3.59494	0.663385	1.39885	-3.73863	-3.99185	-5.32883	-1.58057
R9_A01Y	0.194532	0.560218	-0.402586	1.96358	-5.84145	1.39996	2.6526	3.26026	-0.647708	2.39842	0.158863	0.940343	3.82127	-0.194303	1.48273	-6.14956	-4.24452	-5.70169	4.2932	4.09377	-0.193478	-1.19619	-2.16627	1.69128	0.900571	-2.24334	-0.65596	2.82149	1.9645	-2.49135	-5.23301	-5.98139	-2.69971	-7.33424	-4.40781	-5.12633	-2.07862	-0.483135	0.936071	-5.54551	0.965743	-2.33377	-4.78985	-2.09149	0.576331	-6.55772	-4.88431	-2.79181	-6.39296
Foldchange	1.59567	2.32633	1.53724	1.76885	2.52222	1.70315	1.70883	1.79839	2.68328	2.5095	2.27769	1.58726	0.383678	2.27928	1.87064	2.54952	3.60508	2.58418	1.53315	1.50713	3.21469	3.98924	2.85334	1.52281	1.8185	1.54142	1.98464	1.62193	4.30963	2.57513	1.93827	3.67033	2.21556	1.9869	2.44382	5.60811	1.9891	2.78388	1.83806	1.97424	1.65259	0.176037	1.65238	2.30988	1.59437	2.04048	4.26531	1.54284	1.82864
Pvalue
檢定統計資料a
	VAR00001	VAR00002	VAR00003	VAR00004	VAR00005	VAR00006	VAR00007	VAR00008	VAR00009	VAR00010	VAR00011	VAR00012	VAR00013	VAR00014	VAR00015	VAR00016	VAR00017	VAR00018	VAR00019	VAR00020	VAR00021	VAR00022	VAR00023	VAR00024	VAR00025	VAR00026	VAR00027	VAR00028	VAR00029	VAR00030	VAR00031	VAR00032	VAR00033	VAR00034	VAR00035	VAR00036	VAR00037	VAR00038	VAR00039	VAR00040	VAR00041	VAR00042	VAR00043	VAR00044	VAR00045	VAR00046	VAR00047	VAR00048	VAR00049
Mann-Whitney U 統計資料	109.5	111	127	117	117	85	101	84	101	109.5	110	124	90	101	117	76	72	93	92	109	96	69	97	125	109	118	119	105	94	101.5	126	103	123	127	99	78	116	117	93	101	121	83	95	107	82	116	107	126	105.5
Wilcoxon W	319.5	321	337	327	327	295	311	294	311	319.5	320	334	300	311	327	286	282	303	302	319	306	279	307	335	319	328	329	315	304	311.5	336	313	333	337	309	288	326	327	303	311	331	293	305	317	292	326	317	336	315.5
Z	-2.44826	-2.40746	-1.97466	-2.24516	-2.24526	-3.11076	-2.67796	-3.13781	-2.67796	-2.44815	-2.43451	-2.056	-2.97551	-2.67808	-2.24516	-3.35421	-3.46257	-2.89436	-2.92141	-2.46156	-2.81334	-3.54356	-2.78616	-2.02876	-2.46156	-2.21811	-2.19106	-2.56976	-2.86731	-2.66456	-2.0018	-2.62386	-2.08286	-1.97484	-2.73206	-3.30011	-2.27221	-2.24516	-2.89436	-2.67821	-2.13696	-3.16486	-2.84026	-2.51578	-3.19191	-2.27221	-2.51566	-2.00171	-2.55647
漸近顯著性 （雙尾）	0.0143547	0.016064	0.0483071	0.024758	0.0247513	0.00186606	0.00740723	0.00170215	0.00740723	0.0143593	0.014912	0.0397826	0.00292502	0.00740446	0.024758	0.000795916	0.000535035	0.00379933	0.00348451	0.0138335	0.00490296	0.000394761	0.00533367	0.0424831	0.0138335	0.0265475	0.0284477	0.0101769	0.00413978	0.00770894	0.0453062	0.00869399	0.0372643	0.0482861	0.00629399	0.000966466	0.023074	0.024758	0.00379933	0.00740168	0.0326015	0.00155157	0.00450769	0.0118771	0.00141335	0.023074	0.011881	0.0453163	0.0105739
精確顯著性[2*（單尾顯著性）]	.013b	.015b	.049b	.024b	.024b	.001b	.007b	.001b	.007b	.013b	.014b	.040b	.002b	.007b	.024b	.001b	.000b	.003b	.003b	.013b	.004b	.000b	.005b	.043b	.013b	.026b	.028b	.009b	.004b	.007b	.046b	.008b	.038b	.049b	.006b	.001b	.023b	.024b	.003b	.007b	.033b	.001b	.004b	.011b	.001b	.023b	.011b	.046b	.009b
a. 變數分組：VAR00063
b. 未針對同分值更正。
[truncated: 13 more columns]
